RESEARCH ARTICLE

# Functional Characterization of Cnidarian HCN Channels Points to an Early Evolution of $I_h$

Emma C. Baker<sup>1</sup>, Michael J. Layden<sup>2</sup>, Damian B. van Rossum<sup>1,3</sup>, Bishoy Kamel<sup>1</sup>, Monica Medina<sup>1</sup>, Eboni Simpson<sup>4</sup>, Timothy Jegla<sup>1,3\*</sup>

**1** Department of Biology, Penn State University, University Park, Pennsylvania, United States of America, **2** Department of Biological Sciences, Lehigh University, Bethlehem, Pennsylvania, United States of America, **3** Huck Institutes of the Life Sciences, University Park, Pennsylvania, United States of America, **4** Penn State University Graduate School, Summer Research Opportunities Program (SROP), University Park, Pennsylvania, United States of America

\* [tjj3@psu.edu](mailto:tjj3@psu.edu)

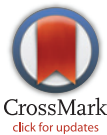

OPEN ACCESS

**Citation:** Baker EC, Layden MJ, van Rossum DB, Kamel B, Medina M, Simpson E, et al. (2015) Functional Characterization of Cnidarian HCN Channels Points to an Early Evolution of  $I_h$ . PLoS ONE 10(11): e0142730. doi:10.1371/journal.pone.0142730

**Editor:** J. David Spafford, University of Waterloo, CANADA

**Received:** August 21, 2015

**Accepted:** October 26, 2015

**Published:** November 10, 2015

**Copyright:** This is an open access article, free of all copyright, and may be freely reproduced, distributed, transmitted, modified, built upon, or otherwise used by anyone for any lawful purpose. The work is made available under the [Creative Commons CC0](https://creativecommons.org/licenses/by/4.0/) public domain dedication.

**Data Availability Statement:** All relevant data are within the paper and its Supporting Information files. Additionally, NvHCN1 and NvHCN2 DNA coding sequences have been submitted to Genbank. Accession numbers are KT580854 and KT580853, respectively.

**Funding:** This study was funded by start-up funds provided by the Eberly College of Science at Penn State University to T.J. ES was funded by the Summer Research Opportunities Program (SROP) run by the Penn State University Graduate School. The funders had no role in study design, data

## Abstract

HCN channels play a unique role in bilaterian physiology as the only hyperpolarization-gated cation channels. Their voltage-gating is regulated by cyclic nucleotides and phosphatidylinositol 4,5-bisphosphate (PIP<sub>2</sub>). Activation of HCN channels provides the depolarizing current in response to hyperpolarization that is critical for intrinsic rhythmicity in neurons and the sinoatrial node. Additionally, HCN channels regulate dendritic excitability in a wide variety of neurons. Little is known about the early functional evolution of HCN channels, but the presence of HCN sequences in basal metazoan phyla and choanoflagellates, a protozoan sister group to the metazoans, indicate that the gene family predates metazoan emergence. We functionally characterized two HCN channel orthologs from *Nematostella vectensis* (Cnidaria, Anthozoa) to determine which properties of HCN channels were established prior to the emergence of bilaterians. We find *Nematostella* HCN channels share all the major functional features of bilaterian HCNs, including reversed voltage-dependence, activation by cAMP and PIP<sub>2</sub>, and block by extracellular Cs<sup>+</sup>. Thus bilaterian-like HCN channels were already present in the common parahoxozoan ancestor of bilaterians and cnidarians, at a time when the functional diversity of voltage-gated K<sup>+</sup> channels was rapidly expanding. NvHCN1 and NvHCN2 are expressed broadly in planulae and in both the endoderm and ectoderm of juvenile polyps.

## Introduction

Voltage-gated cation channels are fundamentally important for rapid transmembrane electrical signaling in neurons and muscle [1], and transcriptome analysis shows that the vast majority of mammalian orthologs are expressed in the brain [2]. However, these channels are widely distributed in eukaryotes and play fundamental signaling roles in all major eukaryotic clades that

collection and analysis, decision to publish, or preparation of the manuscript.

**Competing Interests:** The authors have declared that no competing interests exist.

have been examined. Eukaryotic voltage-gated cation channels are highly diverse in terms of ion selectivity and gating mechanisms, but all can be traced back to a common origin in prokaryotes. They therefore form a single voltage-gated cation channel protein superfamily [1], comprising several structurally and functionally distinct gene families traceable to prokaryotes [1, 3–10]. This ancient set of voltage-gated cation channel gene families diversified greatly within the metazoan lineages. Exploring the functional evolution and origins of these metazoan gene families in detail has only recently become possible with the availability of diverse genomes and transcriptomes from basal metazoans and more diverse protozoans. For instance, voltage-gated K<sup>+</sup> channels can be traced to prokaryotes, but the Shaker, KCNQ and Ether-a-go-go (EAG) gene families that encode our voltage-gated K<sup>+</sup> channels appear metazoan specific [11, 12]. KCNQ channels and the functionally distinct Shab, Shal, Shaw, Eag, Elk and Erg sub-families of the Shaker and Eag gene families emerged surprisingly late within the parahoxozoan lineage (cnidarians, placozoans and bilaterians) [11–13]. The distinct biophysical properties of Shaker, KCNQ and EAG family channels evolved in this parahoxozoan ancestor prior to the divergence of cnidarians and bilaterians [11, 12, 14–18]. Similarly, high-voltage-activated calcium channels predate the Metazoa, but the diversification of this gene family into functionally distinct L-type and N/P/Q/R-type channels likely occurred within the Metazoa [19]. Voltage-gated sodium channels also underwent significant functional diversification and refinement of selectivity specifically within the Metazoa [20].

In this paper we explored the functional evolution of hyperpolarization-gated cation channels (HCN), which form one of three major metazoan branches of the CNBD cation channel family. The CNBD family originated in prokaryotes [7] and derives its name from the presence of a cytoplasmic cyclic nucleotide binding domain which attaches to the channel core at the activation gate via a C-linker domain [21]. The CNBD family is one of the most widespread voltage-gated cation channel families in eukaryotes, including plant and *Paramecium* K<sup>+</sup> channels [22–25]. The CNBD regulates voltage-gating through interactions with the canonical channel core (a voltage-sensor domain, or VSD, plus a pore domain) [26–29], but the mechanisms are not yet fully understood. Interestingly, the role of cyclic nucleotides in gating varies considerably in the CNBD family: CNG channels require cyclic nucleotide binding to open and are virtually insensitive to voltage under physiological conditions [26] while HCN channels are gated primarily by hyperpolarization, and cyclic nucleotides enhance activation to varying degrees [28]. In contrast, EAG family channels are gated by depolarization; their CNBD self-ligands and gating is insensitive to cyclic nucleotides [30–33]; the domain is therefore often referred to as a cyclic nucleotide binding homology domain (CNBHD) [31]. Interestingly, voltage controls VSD movement with the same polarity in HCN and EAG channels, but opposite coupling to pore opening reverses the voltage-dependence of HCN channels to create hyperpolarization-dependent activation [34]. Phosphatidylinositides also regulate CNBD-dependent gating of CNG and HCN channels and promote HCN activation by depolarizing the voltage-activation range [27, 35–37].

HCN channels occupy a unique physiological niche due to their unusual combination of hyperpolarization-gating and poor selectivity between Na<sup>+</sup> and K<sup>+</sup>. They underlie I<sub>h</sub> (or I<sub>f</sub>) *in vivo*, a depolarizing inward current activated by hyperpolarization. The classic HCN channel role is the pacemaker of intrinsically rhythmic neurons and the cardiac pacemaker cells of the sinoatrial node [38–40]. In many intrinsically rhythmic excitable cells, the after-hyperpolarization of an action potential activates I<sub>h</sub>. This current then provides the depolarizing drive for the next action potential. Dynamic regulation of I<sub>h</sub> in the sinoatrial node alters heart rate and depends on both cAMP and PIP<sub>2</sub> signaling [41, 42]. It is also now recognized that HCN channels play a key role in regulating signal integration in dendrites [43–45].

Mammals have 4 HCN channel orthologs with diverse gating properties [46–48], and HCN channels encoding hyperpolarization-gated  $I_h$  currents have been characterized in tunicates [49], sea urchin [50], honey bee [51] and lobster [52]. Classical HCN channels are thus widespread in the Bilateria, although they appear to have been lost in nematode *C. elegans* [8]. An HCN channel is present in a choanoflagellate *Salpingoeca rosetta*, demonstrating that the gene family predates the emergence of metazoans [53], but it has not been functionally expressed. Thus functional evolution of HCN channels prior to the emergence of Bilateria has not been directly examined.

Here we functionally characterized cnidarian HCN channel orthologs. Cnidarians are a sister taxa to the bilaterians within the Parahoxozoa [13], and thus it is possible to use cnidarian HCNs to infer which functional properties were likely present in these channels prior to the emergence of bilaterians. We show that classic  $I_h$ -encoding HCN channels are present in the sea anemone *Nematostella vectensis* (Cnidaria), and thus  $I_h$  was likely present in ancestral parahoxozoans. Molecularly-identifiable HCN channels can also be found in the major basal metazoan lineages (ctenophore and sponge), but their functional properties have yet to be determined.

## Materials and Methods

### Cloning and Molecular Biology

We used a BLAST [54] search strategy relying on various bilaterian HCN channels as queries to search for HCN orthologs in genomes and transcriptomes from cnidarians, ctenophores and sponge. We identified HCN channel coding predictions or transcripts with full coverage of conserved domains from the following species *Nematostella vectensis* (starlet sea anemone) [55], *Orbicella faveolata* (star coral), *Acropora millepora* (stony coral) [56], *Hydra vulgaris* (hydra), *Dryodora glandiformis* (ctenophore) [57] and *Corticium candelabrum* (sponge) [58]. In some cases, gene predictions were manually optimized based on BLAST homology. *Nematostella vectensis* HCN channels (NvHCN1 and NvHCN2) were cloned by standard RT-PCR techniques using total RNA from adult polyps and transferred to the pOX vector [15] for expression in *Xenopus* oocytes. Genbank accession numbers for NvHCN1 and NvHCN2 are KT580854 and KT580853, respectively. *Salpingoeca rosetta* HCN (SrHCN) was synthesized with a *Xenopus*-optimized codon bias, and a CiVSP expression plasmid [59] was obtained from Jianmin Cui, Department of Biomedical Engineering, Washington University, St. Louis. cRNAs were prepared from linear templates using the mMessage mMachine kit (Life Technologies, Carlsbad, CA) and cleaned by LiCl precipitation prior to injection. Full-length NvHCN2 did not grow efficiently in bacteria, so the gene was maintained in pOX in two overlapping halves; transcription templates were prepared by overlap PCR with a high fidelity polymerase.

### Phylogeny

Only HCN channels for which we could identify the entire transmembrane ion channel core and C-terminal CNBD were used for phylogenetic analysis. *Nematostella* and *Orbicella* EAG and CNG channels were used as outgroups; cloning and characterization of the *Nematostella* EAG channels has previously been described [12, 17]. *Nematostella* CNG channels and *Orbicella* EAG and CNG channels were identified and assembled from genome annotations using a BLAST search strategy with human or *Nematostella* orthologs as queries. Five genes in each species encoded channels with best matches to CNG family channels in reciprocal queries of human sequence databases. Amino acid alignments for the phylogeny were built using CLUSTALW as implemented in MEGA6 [60], and manually adjusted as necessary to reflect structural conservation. A Bayesian inference phylogeny was constructed with Mr. Bayes v3.2 [61]

using a mixed model, two independent runs of four chains and 1,000,000 generations. Trees were sampled at 1,000 generation intervals and the first 25% were discarded (burn in phase).

### *Xenopus* oocyte electrophysiology

*Xenopus* ovaries were obtained from *Xenopus* I (Ann Arbor, MI) and mature oocytes were isolated and defolliculated with 1–2 mg/ml Type II Collagenase (Sigma Aldrich, St. Louis, MO) as previously described [62]. Oocytes were injected with 50 nl of solution containing 5–50 ng cRNA dissolved in nuclease-free water supplemented with a 1:20 dilution Superasin (Life Technologies, Carlsbad, CA). We used 10–20 ng cRNA for CiVSP experiments, which was effective for inhibiting PIP<sub>2</sub>-dependent KCNQ channels in previous studies [11]. Subsequent to injection, oocytes were incubated at 18°C in ND98 (98 mM NaCl, 2 mM KCl, 1 mM MgCl<sub>2</sub>, 1.8 mM CaCl<sub>2</sub>, 5 mM HEPES, 2.5 mM Na-pyruvate, 100 U/mL penicillin, 100 µg/mL streptomycin, pH 7.2) for 1–5 days before recording.

HCN current recordings were made from whole oocytes under constant perfusion using standard two-electrode voltage clamp (TEVC) techniques. Borosilicate glass electrodes were filled with 3 M KCl and typically had resistances of 0.5–1 MΩ; bath clamp circuitry was placed in 1 M NaCl and connected to the recording chamber with a 1 M NaCl 1% agarose bridge. The recording solution consisted of in mM (98 NaOH, 2 KOH, 2 KCl, 2 CaCl<sub>2</sub>, 1 Mg Cl<sub>2</sub>, 5 HEPES, pH 7.5 with methanesulfonic acid, making the major anion methanesulfonate). 8-Br-cAMP and CsCl were added at the specified concentrations to this base solution. Data were acquired using a CA1B amplifier (Dagan Instruments, Minneapolis, MN) in TEVC mode and the pClamp 10 acquisition suite (Molecular Devices, Sunnyvale, CA). Data were sampled at 10 kHz and low pass filtered at 2 kHz.

Conductance-voltage (GV) relationships were determined from isochronal tail currents recorded at -50 mV after 4 s hyperpolarizing steps. Data were fitted with a single Boltzmann in Origin 2015 (OriginLab, Northampton, MA) using the equation  $f(V) = (I_1 - I_2)/(1 + e^{(V - V_{50})/s}) + I_2$ , where  $V_{50}$  represents is the half activation voltage,  $s$  is the slope factor, and  $I_1$  and  $I_2$  represent the lower and upper asymptotes. Data from individual oocytes were fit independently and normalized to facilitate averaging. The Boltzmann fits shown in figure panels display the arithmetic means of the  $V_{50}$  and  $s$  values from individual fits. Activation time course was complex, including sigmoidal delay and multiple exponentials. Therefore, we quantified activation time course simply as the time needed for 50% activation at -100 mV. Deactivation time course was similarly complex, so we quantified the time required for 75% deactivation at 10 mV following a 1 s step to -100 mV. For measurements of the effect of CiVSP on the NvHCN1 GV, hyperpolarizing pulses were preceded by a 2 s step to +60 mV followed by a 400 ms step to the holding potential of -30 mV. In principle this -30 mV step will allow some recovery of PIP<sub>2</sub>, but we wanted to temporally isolate the hyperpolarizing activation steps from the +60 mV pulse to avoid direct PIP<sub>2</sub>-independent effects of holding voltage on the activation rate. For deactivation measurements in the presence of CiVSP, the +60 mV pulse was shortened to 1 s.

### *In Situ* Hybridization

*NvHCN1* and *NvHCN2* probes were cloned into pGEM-T (Promega, Madison, WI) using standard PCR and ligation protocols. DIG-labeled UTP mRNA anti-sense probes were generated as previously described (Wolenski et al., Nature Protocols 2013). *Nematostella* embryos were grown at 25°C in 1/3X Instant Ocean (Instant Ocean, Blacksburg, VA) artificial sea water and fixed at 12 hours post fertilization (hpf) (early gastrula), 24 hpf (late gastrula), 48 hpf (planula), 96 hpf (late planula), and 192 hpf (polyp) stages. mRNA *in situ* hybridizations were carried out

using previously described methods (Wolenski et al., Nature Protocols 2013). Animals were imaged using a Nikon Eclipse Ni-E (Nikon, Tokyo, Japan) in conjunction with a Nikon DS-Ri2 color camera and Nikon NIS Elements software.

## Ethics Statement

*Xenopus* oocyte tissue samples were obtained from a licensed aquaculture vendor (Xenopus I). *Nematostella* tissue samples for RNA isolation were obtained from animals maintained according to best practices developed in the *Nematostella* community to optimize animal health.

## Results

In order to determine if HCN channels with classical  $I_h$  properties evolved prior to the emergence and radiation of the bilaterians, we set out to examine the sequence and function of cnidarian HCN channels. We identified two putative HCN orthologs in BLAST searches of a cnidarian, the sea anemone *Nematostella vectensis*, and cloned full length coding sequences by RT-PCR. Fig 1 shows a sequence alignment spanning the region of conservation between the two *Nematostella vectensis* HCN channels, NvHCN1 and NvHCN2, and HCN channels from human and *Drosophila*. The alignment was generated using COBALT [63] and manually adjusted in the S4 region. Conservation is present through the transmembrane core of the channel (S1-S6) and the CNBD. 169/504 positions in the displayed alignment are identical in all sequences, with an additional 57 and 106 identical positions shared within either the *Nematostella* or the bilaterian sequences, respectively.

While the sequence alignment presented in Fig 1 strongly suggests that NvHCN1 and NvHCN2 are true HCN orthologs, we performed a phylogenetic analysis to confirm this classification and examine the evolution of the HCN family within the metazoan lineage. Fig 2 shows a Bayesian inference phylogeny of the HCN channel family including NvHCN1, NvHCN2 and additional sequences we identified in BLAST searches from cnidarians (star coral, *Orbicella faveolata*; stony coral, *Acropora millepora*; hydra, *Hydra vulgaris*), ctenophore (*Dryodora glandiformis*) and sponge (Homoscleromorpha, *Corticium candelabrum*), compared to bilaterian and choanoflagellate HCNs. We used cnidarian EAG and CNG channels as CNBD channel family outgroups, and all putative HCN channel genes identified by BLAST grouped exclusively within the HCN family. However, the phylogeny does not resolve the relationship between the HCN family and the two outgroups. *Nematostella* and *Orbicella* share two HCN orthologs (NvHCN1 and NvHCN2 in *Nematostella*), suggesting a gene duplication occurring prior to the divergence of sea anemones and corals. *Acropora* appears to have orthologs of both genes, but only the NvHCN2 ortholog was analyzed here; the presence of NvHCN1 in *Acropora* is suggested by a small transcript fragment with 77% identity to amino acids 541–604 of NvHCN1 (EZ005349.1). NvHCN1 and NvHCN2 are only 48% identical over the same region (Fig 1). NvHCN1 groups with choanoflagellate and sponge HCN channels, while NvHCN2 groups with the bilaterian HCN channels. While this positioning could be interpreted to mean there were two ancestral HCN orthologs in a choanoflagellate/metazoan ancestor, with loss of one ancestor in all lineages except cnidarians, we prefer the interpretation that NvHCN1 and NvHCN2 were produced by a duplication within cnidarians prior to the divergence of the anthozoans lineages represented here. We have frequently observed asymmetric divergence in one or more paralogs of ion channel gene expansions restricted to cnidarians or bilaterians that causes separation of the paralogs within the tree [8, 16, 17]. More in-depth coverage of basal metazoan and cnidarian species could resolve this question.

The basal position of the *Dryodora* HCN sequence within the HCN family does not strictly follow species phylogeny (as it is basal to the *Salpingoeca* HCN channel), but is in keeping with

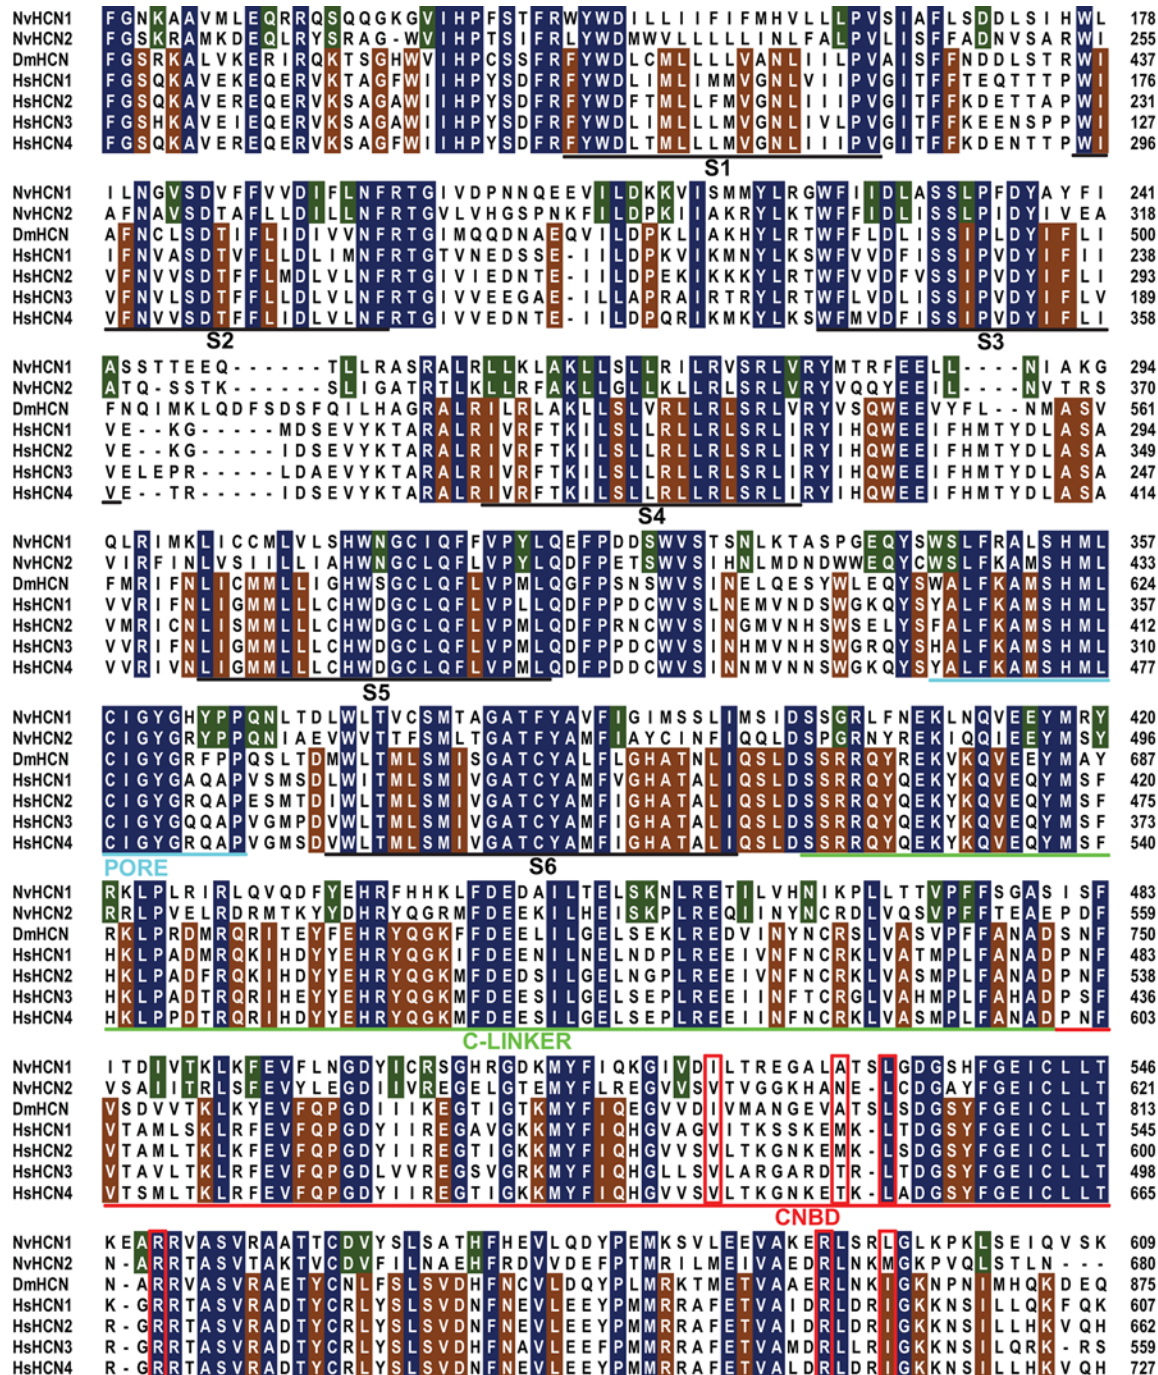

**Fig 1. Multiple amino acid sequence alignment comparing sea anemone, human and *Drosophila* HCN channels.** The alignment compares two putative HCN channels from the sea anemone *Nematostella vectensis* (NvHCN1 and NvHCN2) to HCN channels from *Drosophila* (DmHCN) and human (HsHCN1-4); residue positions are given at the right margin. Positions identical in all sequences are shaded in blue, and additional residues identical in *Nematostella* or the bilaterian sequences are shaded in green or brown, respectively. Approximate positions of 6 transmembrane domains (S1-S6) and the selectivity filter (PORE) are underlined and labeled in black or cyan, respectively. The C-linker is underlined in light green and the CNBD is underlined in red. Residues that contact cAMP in an HCN2 structure are boxed with a red outline. Accession numbers and full sequences are provided in S1 Table.

doi:10.1371/journal.pone.0142730.g001

genome analyses that show a high degree of sequence divergence in ctenophores and place them at the base of the metazoan phylogeny [57, 64, 65]. Discordance between species

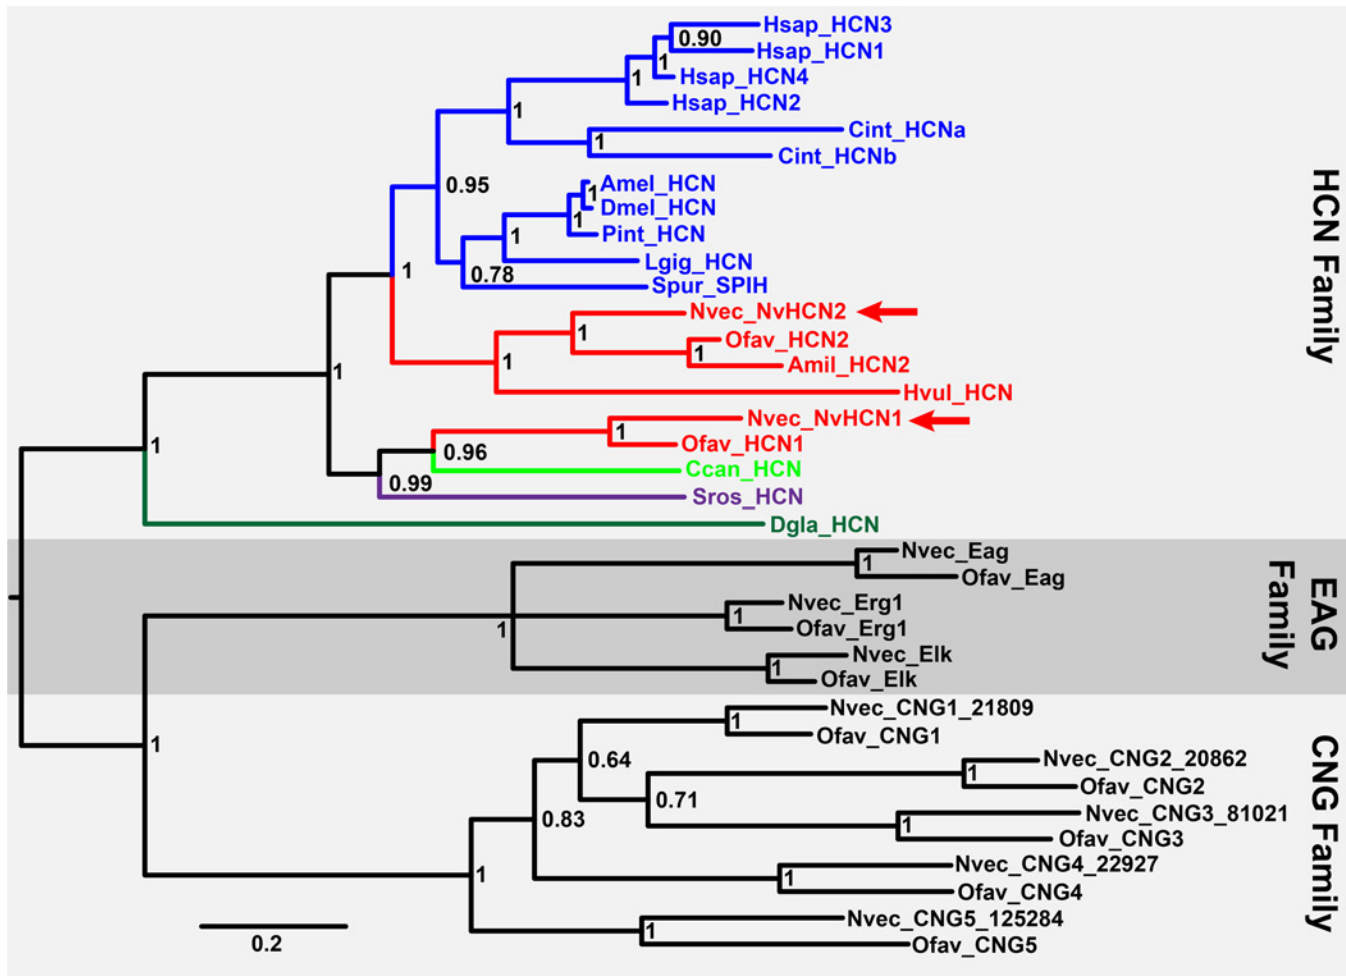

**Fig 2. Bayesian inference phylogeny of the HCN channel family.** Channels in the HCN family are color coded by phylogenetic group: bilaterians (blue), cnidarians (red), sponge (light green), ctenophore (dark green) and choanoflagellate (purple). The HCN family and the EAG and CNG family outgroups are indicated with shading and labels at the right margin. All outgroup sequences are cnidarian, but are not colored. Posterior probabilities for nodes are indicated and the scale bar is in substitutions/site. Channel names are given at branch tips with species prefixes as follows: Amil, *Acropora millepora*, stony coral; Amel, *Apis mellifera*, honey bee; Ccan, *Corticium candelabrum*, sponge; Cint, *Ciona intestinalis*, tunicate; Dmel, *Drosophila melanogaster*, fruit fly; Dgla, *Dryodora glandiformis*, ctenophore; Hsap, *Homo sapiens*, human; Hvul, *Hydra vulgaris*, hydra; Lgig, *Lottia gigantea*, limpet; Nvec, *Nematostella vectensis*, sea anemone; Ofav, *Orbicella faveolata*, coral; Pint, *Panulirus interruptus*, lobster; Spur, *Strongylocentrotus purpuratus*, sea urchin; and Sros, *Salpingoeca rosetta*, choanoflagellate. Full and aligned sequences for all branches are given in [S1 Table](#).

doi:10.1371/journal.pone.0142730.g002

phylogenies and individual gene family phylogenies is a long-recognized and common issue in phylogenetics and is especially common for deeply diverging lineages [66, 67]. Another example of discordance observed here is the grouping of the sea urchin HCN SpIH with the protostome rather than deuterostome sequences. HCN-like sequences were widely present in cnidarian and ctenophore genomes and transcriptomes [57, 65, 68, 69], but we were only able to identify sequences sufficiently complete for robust phylogenetic analysis in *Nematostella*, *Acropora*, *Hydra*, *Orbicella* and *Dryodora*. In contrast, *Corticium* was the only one of 8 sponge transcriptomes [58] and 1 sponge genome [70] in which we identified an HCN channel. Previously, the Shaker K<sup>+</sup> channel family was found exclusively within *Corticium* among these sponges [11, 58]. The *Corticium* transcriptome is rich in gene diversity compared to sponges from the family Silicea [58], but it remains possible that the limited spread of HCN channels in sponge is in part due to incomplete genome coverage. Similarly, HCN channels were not found

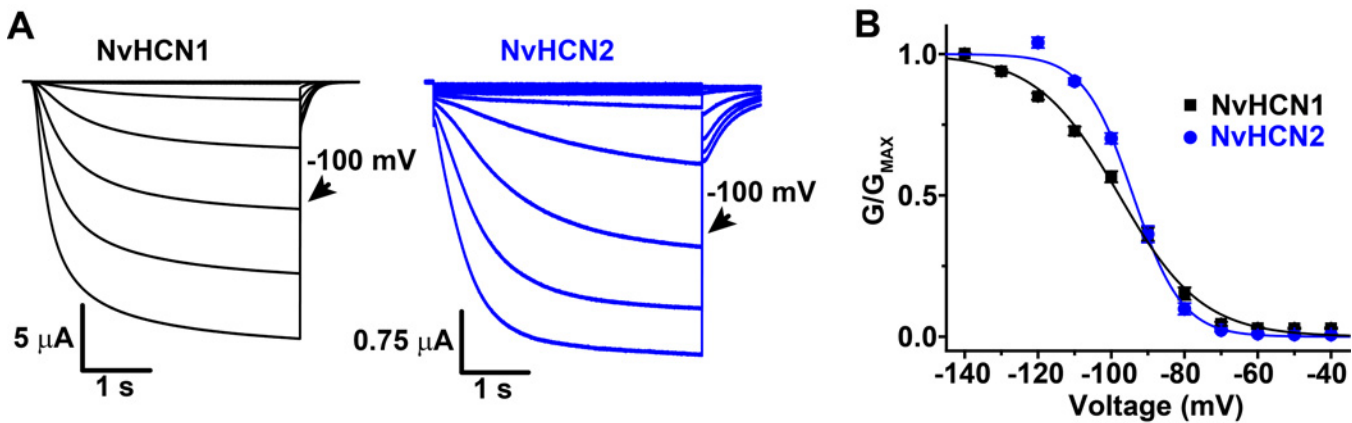

**Fig 3. *Nematostella* HCN orthologs NvHCN1 and NvHCN2 are activated by hyperpolarization.** (A) Families of inward currents recorded from *Xenopus* oocytes expressing NvHCN1 (left) and NvHCN2 (right) in response to 4 s hyperpolarizing voltage steps ranging from -40 to -120 mV in 10 mV increments. The holding potential was -30 mV and tail currents were recorded at -50 mV. Scale bars indicate time and current size and the -100 mV sweep is indicated with an arrow. (B) GV curves for NvHCN1 and NvHCN2. Fractional open probability ( $G/G_{MAX}$ ) was measured from isochronal tail currents recorded at -50 mV after 4 s hyperpolarizing steps to the indicated voltages as shown in (A). Data are normalized and show mean  $\pm$  S.E.M. of measurements from individual cells. The smooth curves show single Boltzmann fits.  $V_{50}$ , slope values and sample numbers are reported in Table 1.

doi:10.1371/journal.pone.0142730.g003

in the genome of a second choanoflagellate *Monosiga brevicollis* [53, 71] and we did not find HCN channels in the placozoan *Trichoplax adhaerens* [72]. HCN channels are therefore widespread though not ubiquitous in parahoxozoans, the consensus basal metazoan lineages ctenophore and sponge [57, 65] and choanoflagellates. Further sequencing will be needed to determine whether the absence of HCN channels in some species is truly due to gene loss.

We next tried to express the *Salpingoeca* (SrHCN) and *Nematostella* (NvHCN1 and NvHCN2) orthologs in *Xenopus* oocytes for electrophysiological characterization in order to better understand how the functional properties of the HCN family evolved. We were unable to obtain evidence for functional expression of SrHCN as measured by voltage clamp despite codon optimization, co-expression with mouse HCN orthologs or application of the cell-permeable cAMP analog 8-Br-cAMP. We therefore were unable to shed light on the functional phenotype of HCN channels prior to the emergence of the Metazoa. However, NvHCN1 and NvHCN2 expression yielded robust inward currents in response to hyperpolarization with typical features of bilaterian  $I_h$  (Fig 3A). NvHCN1 and NvHCN2 currents activate slowly in response to hyperpolarizing voltage steps and had very hyperpolarized voltage-activation (GV) curves with midpoints of  $-97.8 \pm 1.1$  mV and  $-94.0 \pm 0.7$  mV, respectively (Fig 3A and 3B, Table 1). Compared to mammalian HCN channels, these properties are most similar HCN4, which has the unusually slow activation gating and a hyperpolarized GV [48, 73]. NvHCN1 and NvHCN2 were also blocked by extracellular  $Cs^+$ , a characteristic blocker of  $I_h$  (Fig 4A and 4B). At -100 mV, the NvHCN1 and NvHCN2 currents were blocked ~90% and ~50% by 5 mM  $Cs^+$ , respectively (Fig 4B). We did not characterize the selectivity of the *Nematostella* HCN channel in detail, but tail currents reversed near -30 mV, which would require permeability to both  $Na^+$  and  $K^+$  in our recording solutions.

We next bath applied 2 mM of the cell-permeable cAMP analog 8-Br-cAMP to voltage-clamped oocytes in order to determine whether NvHCN1 and NvHCN2 can be activated by cyclic nucleotides. 8-Br-cAMP accelerated voltage-activation and slowed deactivation of NvHCN2 but had no effect on the activation and deactivation kinetics of NvHCN1 (Fig 5A–5C). 2 mM 8-Br-cAMP significantly depolarized the GV curve of NvHCN2 by  $6.1 \pm 1$  mV ( $p < 0.01$ , t-test), but did not alter the GV curve of NvHCN1 (Fig 5D and 5E, Table 1). In



**Table 1. Boltzmann fit parameters for NvHCN1 and NvHCN2 GV curves.**

|                                 | Parameters                   | Mean   | S.E.M. | n <sup>a</sup> |
|---------------------------------|------------------------------|--------|--------|----------------|
| NvHCN1                          | V <sub>50</sub> <sup>b</sup> | -97.8  | 1.1    | 9              |
|                                 | s <sup>c</sup>               | 11.3   | 0.3    |                |
| NvHCN1 + 8-Br-cAMP <sup>d</sup> | V <sub>50</sub>              | -97.8  | 1.5    | 7              |
|                                 | s                            | 11.9   | 0.3    |                |
| NvHCN1 + CiVSP                  | V <sub>50</sub>              | -103.7 | 1.4    | 7              |
|                                 | s                            | 8.7    | 0.3    |                |
| NvHCN2                          | V <sub>50</sub>              | -94.0  | 0.7    | 8              |
|                                 | s                            | 6.7    | 0.4    |                |
| NvHCN2 + 8-Br-cAMP              | V <sub>50</sub>              | -87.9  | 1.5    | 8              |
|                                 | s                            | 6.8    | 0.2    |                |

<sup>a</sup>n, number of measurements

<sup>b</sup>V<sub>50</sub>, half-maximal activation voltage, mV

<sup>c</sup>s, slope factor, mV

<sup>d</sup>Bath applied at 2 mM

doi:10.1371/journal.pone.0142730.t001

terms of cAMP sensitivity, NvHCN1 and NvHCN2 are most comparable to mammalian HCN3 which is completely insensitive to cAMP [74, 75] and mammalian HCN1 which has modest cAMP sensitivity with a GV shift of less than 10 mV [28]. However, a more direct comparison of cAMP sensitivity would require direct application to the intracellular face of excised patches, which we did not attempt here due to channel expression levels.

To determine whether Cnidarian HCN channels were sensitive to PIP<sub>2</sub>, we co-expressed NvHCN1 with a voltage-dependent phosphatidylinositol phosphatase from *Ciona intestinalis*, CiVSP, which depletes PIP<sub>2</sub> in response to depolarization [76, 77]. We have previously observed strong depletion of PIP<sub>2</sub> using CiVSP in whole oocytes as measured by inhibition of KCNQ channels which require PIP<sub>2</sub> to open [11]. Activation of CiVSP with a depolarizing pre-

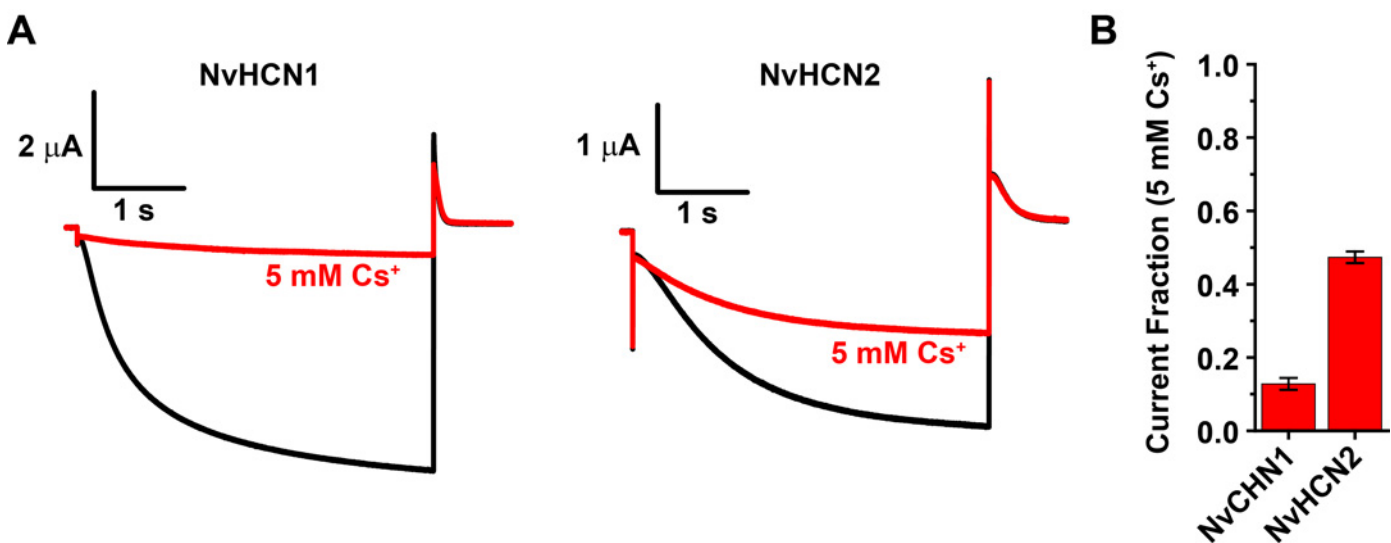

**Fig 4. Cs<sup>+</sup> block of NvHCN1 and NvHCN2.** (A) Current traces recorded at -100 mV from oocytes expressing NvHCN1 or NvHCN2 before (black) and after (red) application of 5 mM Cs<sup>+</sup> to the bath. The holding potential was -30 mV and outward tail currents were recorded at 0 mV. (B) Fraction of current remaining after application of 5 mM Cs<sup>+</sup> for NvHCN1 and NvHCN2. Data show mean ± S.E.M. (n = 6 and 7 for NvHCN1 and NvHCN2, respectively).

doi:10.1371/journal.pone.0142730.g004

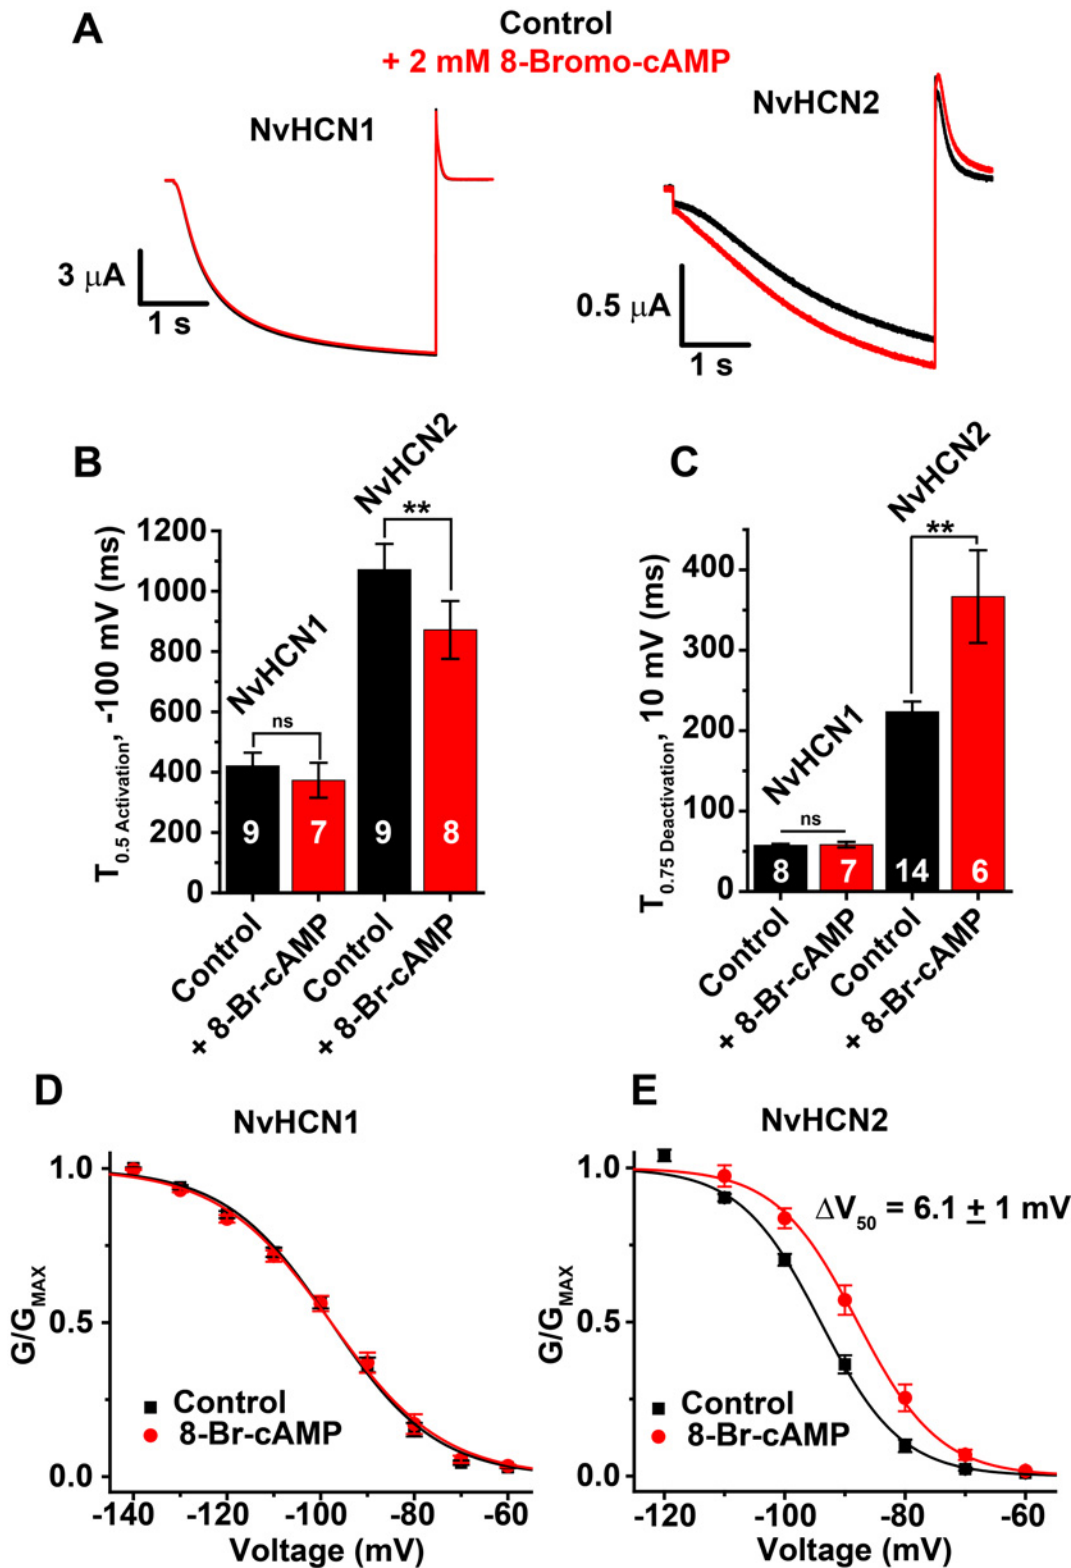

**Fig 5. 8-Br-cAMP enhances activation of NvHCN2 but not NvHCN1.** (A) Examples of currents recorded in response to 4 s -100 mV voltage steps before (black) and after (red) bath application of 2 mM 8-Br-cAMP (-30 mV holding potential, tails recorded at 0 mV). (B) Half activation times at -100 mV for NvHCN1 and NvHCN2 before (black) and after (red) the addition of 2 mM 8-Br-cAMP. (C) 75% deactivation time at 10 mV for NvHCN1 and NvHCN2 with (red) and without (black) 2 mM 8-Br-cAMP. (D,E) GV curves for NvHCN1 and NvHCN2 with (red) and without (black) 2 mM 8-Br-cAMP. All data show

mean  $\pm$  S.E.M. and smooth curves in D and E show single Boltzmann fits of the data (parameters and sample number reported in Table 1). Sample numbers for (C) and (D) are shown on data bars. \*\*Significance at  $p < 0.01$  (t-test); ns, no significant difference.

doi:10.1371/journal.pone.0142730.g005

pulse to +60 mV for 1 s significantly slowed the activation time course and sped the deactivation time course of NvHCN1 currents (Fig 6A–6C). These kinetic changes were reflected in a  $-6.0 \pm 2$  mV shift in the GV curve (Fig 6D, Table 1) when CiVSP was active. These results suggest that PIP<sub>2</sub> enhances voltage-activation of NvHCN1, as has been observed for bilaterian

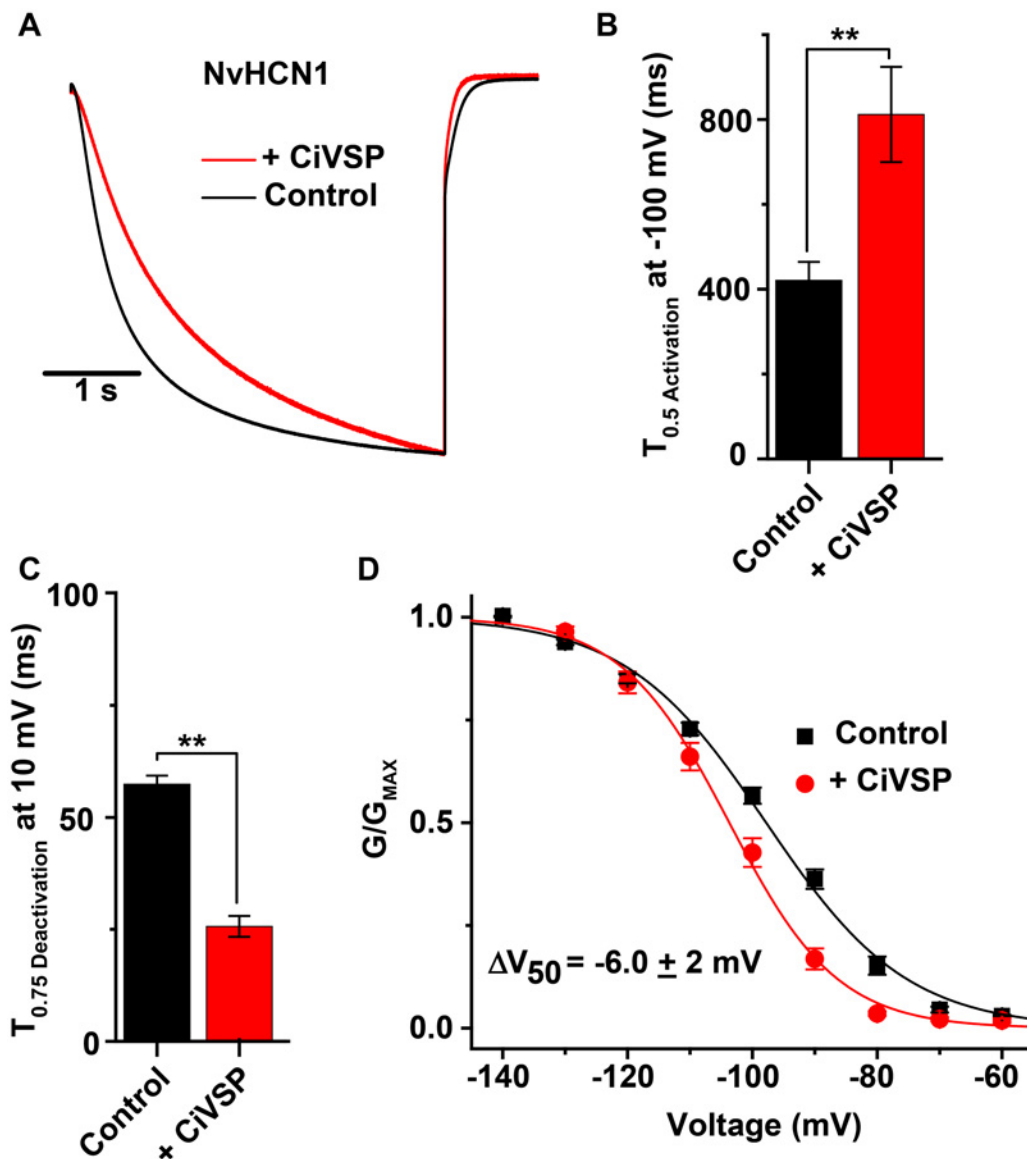

**Fig 6. PIP<sub>2</sub> depletion inhibits activation of NvHCN1.** (A) Normalized current traces recorded in response to a 4 s -100 mV voltage step for control (black) and with PIP<sub>2</sub> depletion by CiVSP (red). The holding voltage was -30 mV and tails were recorded at -50 mV. CiVSP was activated with a 2 s step to +60 mV 400 ms prior to the hyperpolarizing current step. (B) Half activation time at -100 mV for NvHCN1 control (black) and for CiVSP-dependent PIP<sub>2</sub> depletion (red). (C) 75% deactivation time at +10 mV for NvHCN1 controls (black) and for PIP<sub>2</sub> depletion (red). (D) GV curves for NvHCN1 controls and NvHCN1 + CiVSP-dependent PIP<sub>2</sub> depletion. All data show mean  $\pm$  S.E.M.; \*\* in B and C indicates significant difference ( $p < 0.01$ , t-test,  $n = 7-9$ ). Smooth curves in D show single Boltzmann fits of the data; fit parameters and sample numbers are reported in Table 1.

doi:10.1371/journal.pone.0142730.g006

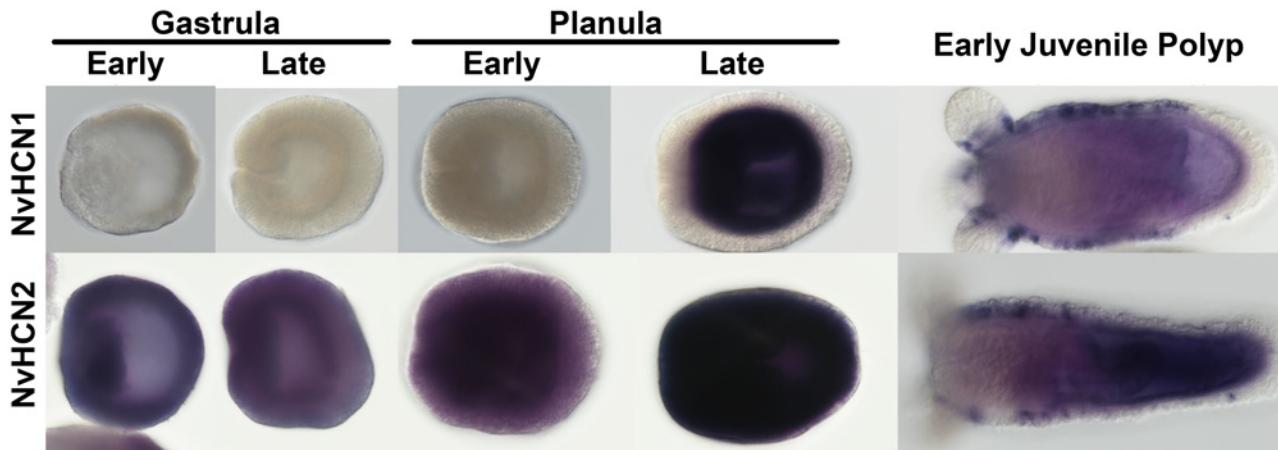

**Fig 7. *In situ* hybridization of NvHCN1 and NvHCN2 expression.** Examples of typical expression patterns in gastrulae, planulae and juvenile polyps are shown for *NvHCN1* (top row) and *NvHCN2* (bottom row). Animals were hybridized with anti-sense probes and detected colorimetrically (purple).

doi:10.1371/journal.pone.0142730.g007

HCN channels [27, 37, 41]. We compared the effects of CiVSP activation to controls recorded in the absence of CiVSP co-expression, because we assumed the chronically-depolarized resting potential of NvHCN1-expressing oocytes would lead to a baseline reduction in PIP<sub>2</sub> in NvHCN1 + CiVSP oocytes. We did not examine the effect of CiVSP on NvHCN2 because it was difficult to simultaneously inject oocytes with sufficient amounts of both cRNAs, given the low expression level of NvHCN2.

We examined the expression pattern of *NvHCN1* and *NvHCN2* in gastrula, planula and juvenile polyps using *in situ* hybridization (Fig 7). *NvHCN1* expression began in the late planula with strong, diffuse endodermal staining. Endodermal expression was maintained into juvenile polyps. *NvHCN1* expression was also detected in a punctate pattern in the body column and base of the tentacles in the juvenile polyp ectoderm. *NvHCN2* expression began as diffuse ubiquitous expression in the early gastrula, which increased to strong ubiquitous expression by planula stages. However, by juvenile polyp stages the ectodermal *NvHCN2* expression resolved into a punctate pattern while the endodermal expression retained a diffuse ubiquitous expression. The *NvHCN2* and *NvHCN1* expression patterns at polyp stages are remarkably similar, raising the possibility that heteromeric NvHCN channels could potentially form *in vivo* in *Nematostella*. The strength and diffuse nature of NvHCN1 expression at early developmental stages made it difficult to observe details of the expression pattern. We do not know the identity of the cells giving rise to the ectodermal punctae in juvenile polyps, but two cell types that commonly lead to punctate ectodermal labeling are neurons and cnidocytes [78, 79], which likely share a neuronal lineage [80].

## Discussion

We show here that I<sub>h</sub>-encoding HCN channels were present prior to the divergence of cnidarians and bilaterians. These findings add to a growing body of evidence that the major evolutionary innovations in metazoan voltage-gated cation channel signaling were complete by this time. Cnidarians and bilaterians also share 8 functionally conserved lineages of voltage-gated K<sup>+</sup> channels [11, 12, 14–18] and voltage gated Na<sup>+</sup> channels with strict or lax selectivity vs. Ca<sup>2+</sup> [20]. All other functionally distinct molecular classes of the bilaterian voltage-gated cation channel superfamily can also be found in cnidarians [1, 8, 19, 81], but they have not yet been functionally expressed.

NvHCN1 and NvHCN2 collectively share several key functional features of bilaterian HCN channels beyond the classic hyperpolarization-dependent activation. These include block by  $\text{Cs}^+$ , potentially activation by cyclic nucleotides for NvHCN2 and activation by  $\text{PIP}_2$  for NvHCN1 (deduced from inhibition following  $\text{PIP}_2$ -depletion with CiVSP). The reason for the difference in cyclic nucleotide sensitivity between NvHCN1 and NvHCN2 is not clear because both have similar levels of conservation across 6 residues shown to contact cAMP in the structure of a mammalian HCN2 Channel (Fig 1, [21]), with 3 out of 6 residues identical and the others conservatively substituted. Mammalian HCN channels are identical at 5/6 of these positions yet vary considerably in cAMP sensitivity. Interestingly, all appear to bind cAMP, but differences in how the C-linker/CNBHD interacts with the channel core appear to determine the degree to which cAMP binding leads to channel activation [28, 75]. Thus the molecular basis for differential cyclic nucleotide sensitivity in NvHCN1 and NvHCN2 could lie outside the binding region. 8-Br-cAMP has been used extensively to explore the cAMP sensitivity of HCN channels [49, 52, 82] and typically shows close correspondence with results obtained by direct application of cyclic nucleotides to the intracellular face of excised patches [75, 83, 84]. Nevertheless, it remains possible the cAMP modulation we observed for NvHCN2 is indirect because we tested cyclic nucleotide sensitivity by bath application of 8-Br-cAMP.

The residues responsible for  $\text{PIP}_2$ -dependent enhancement of voltage-activation in HCN channels have not yet been identified, but are believed to lie within the channel core [27]. Basic residues in the S4-S5 linker and S6 activation gate region interact with  $\text{PIP}_2$  in Shaker and KCNQ channels to influence voltage-gating [85, 86] and it is possible that a similar interaction takes place in HCN channels. HCN channels have basic residues within the same regions (see Fig 1), but their positions are not precisely conserved and their roles in  $\text{PIP}_2$  modulation have not been tested.  $\text{PIP}_2$  often modulates voltage-gated channels, including the sea urchin HCN channel SpIH, in a bimodal manner with opposing effects on voltage-gating and maximal current [27, 85, 87]. For instance, two basic residues in the C-linker are needed for a small  $\text{PIP}_2$ -dependent inhibition of the maximal SpIH current [27]. Our CiVSP experiments did not have the resolution required to detect small changes in current size, and the presence of bimodal  $\text{PIP}_2$ -modulation has not been confirmed in other HCN channels. We did not examine effects of  $\text{PIP}_2$  on current size further because neither basic residue is conserved in NvHCN1.

HCN channels are present in ctenophores, sponge and choanoflagellates, but we were unable to determine the functional properties of channels from these species in this study. Assuming that the  $I_h$  current phenotype tracks with the appearance of the HCN family, then  $I_h$  likely evolved in protozoans and was only later adapted for control of rhythmic excitability of neurons and muscle. It has been proposed that an  $I_h$ -like current could have utility in regulating flagellum-based movements in choanoflagellates, similar to the role of  $I_h$  in regulating animal sperm motility [50, 53]. CNBD family channels found in other protozoans and prokaryotes so far do not belong to the HCN family [7, 23], suggesting that HCN might have arisen in a recent common ancestor of choanoflagellates and metazoans.

CNG channels share a similar pre-metazoan origin; metazoan-like CNG channels can be found in the choanoflagellate *Monosiga brevicollis* [8, 53, 71]. We show in Fig 1 that multiple CNG family orthologs are present in cnidarians, but we did not explore their functional properties in this study. EAG channels in contrast have a later origin and appear to be metazoan-specific. They are present in basal metazoans (ctenophores) but only diversified into the functionally distinct Elk, Eag and Erg subfamilies later within the Parahoxozoa [12, 17]. Thus it may be depolarization-gating rather than hyperpolarization-gating that is a “reversed” gating feature within the metazoan CNBD channel family. The polarity and importance of voltage-gating indeed appears to have been highly plastic within the CNBD family throughout its evolutionary history. The prokaryotic CNBD channel expressed so far is only weakly

voltage-dependent [7], while plant CNBD family K<sup>+</sup> channels include both hyperpolarization- and depolarization-gated channels [88].

Our *in situ* analysis shows several distinct patterns for *NvHCN* expression. First, at polyp stages both *NvHCN1* and *NvHCN2* are expressed ubiquitously within the endoderm and in punctate patterns within the ectoderm, which might overlap. *NvHCN1* is expressed strongly in the endoderm at the planula larval stages, and *NvHCN2* is expressed ubiquitously throughout much of early development. The discrete puncta expression in the polyp ectoderm is reminiscent of neural expression patterns [78, 89]. However, without transgenic reporters or a detailed expression analysis with neuronal markers, it is not possible to determine if these cells are neurons, cnidocytes or a previously uncharacterized cell type. The ubiquitous endodermal expression in *Nematostella* polyps is intriguing, because the myoepithelial cells that control the rhythmic contraction of the body column [17] are present throughout the endodermal tissue [90]. It is not yet known if contractile rhythmicity in *Nematostella* is intrinsic to the myoepithelium or driven by neuronal input. Regardless, it would be interesting to determine if HCN channels contribute to rhythmic behaviors in *Nematostella*, which could point to an established role in rhythm generation in ancestral parahoxozoans prior to the divergence of cnidarians and bilaterians.

## Supporting Information

**S1 Table. Sequences used in Fig 1 phylogeny.**  
(XLSX)

## Author Contributions

Conceived and designed the experiments: ECB MJL DBvR TJ. Performed the experiments: ECB MJL DBvR ES TJ. Analyzed the data: ECB MJL DBvR TJ. Contributed reagents/materials/analysis tools: BK MM. Wrote the paper: MJL TJ.

## References

1. Yu FH, Catterall WA. The VGL-chanome: a protein superfamily specialized for electrical signaling and ionic homeostasis. *Sci STKE*. 2004; 2004(253):re15. Epub 2004/10/07. [stke.2532004re15](https://doi.org/10.1126/stke.2532004re15) [pii] doi: [10.1126/stke.2532004re15](https://doi.org/10.1126/stke.2532004re15) PMID: [15467096](https://pubmed.ncbi.nlm.nih.gov/15467096/).
2. Gustincich S, Batalov S, Beisel KW, Bono H, Carninci P, Fletcher CF, et al. Analysis of the mouse transcriptome for genes involved in the function of the nervous system. *Genome research*. 2003; 13(6b):1395–401. Epub 2003/06/24. doi: [10.1101/gr.1135303](https://doi.org/10.1101/gr.1135303) PMID: [12819138](https://pubmed.ncbi.nlm.nih.gov/12819138/); PubMed Central PMCID: [PMC403671](https://pubmed.ncbi.nlm.nih.gov/PMC403671/).
3. Doyle DA, Morais Cabral J, Pfuetzner RA, Kuo A, Gulbis JM, Cohen SL, et al. The structure of the potassium channel: molecular basis of K<sup>+</sup> conduction and selectivity. *Science*. 1998; 280(5360):69–77. Epub 1998/04/29. PMID: [9525859](https://pubmed.ncbi.nlm.nih.gov/9525859/).
4. MacKinnon R, Cohen SL, Kuo A, Lee A, Chait BT. Structural conservation in prokaryotic and eukaryotic potassium channels. *Science*. 1998; 280(5360):106–9. Epub 1998/04/29. PMID: [9525854](https://pubmed.ncbi.nlm.nih.gov/9525854/).
5. Jiang Y, Lee A, Chen J, Cadene M, Chait BT, MacKinnon R. Crystal structure and mechanism of a calcium-gated potassium channel. *Nature*. 2002; 417(6888):515–22. Epub 2002/05/31. doi: [10.1038/417515a](https://doi.org/10.1038/417515a) PMID: [12037559](https://pubmed.ncbi.nlm.nih.gov/12037559/).
6. Jiang Y, Lee A, Chen J, Ruta V, Cadene M, Chait BT, et al. X-ray structure of a voltage-dependent K<sup>+</sup> channel. *Nature*. 2003; 423(6935):33–41. Epub 2003/05/02. doi: [10.1038/nature01580](https://doi.org/10.1038/nature01580) PMID: [12721618](https://pubmed.ncbi.nlm.nih.gov/12721618/).
7. Brams M, Kusch J, Spurny R, Benndorf K, Ulens C. Family of prokaryote cyclic nucleotide-modulated ion channels. *Proc Natl Acad Sci U S A*. 2014; 111(21):7855–60. doi: [10.1073/pnas.1401917111](https://doi.org/10.1073/pnas.1401917111) PMID: [24821777](https://pubmed.ncbi.nlm.nih.gov/24821777/); PubMed Central PMCID: [PMC4040583](https://pubmed.ncbi.nlm.nih.gov/PMC4040583/).
8. Jegla TJ, Zmasek CM, Batalov S, Nayak SK. Evolution of the human ion channel set. *Comb Chem High Throughput Screen*. 2009; 12(1):2–23. Epub 2009/01/20. PMID: [19149488](https://pubmed.ncbi.nlm.nih.gov/19149488/).

9. Kuo MM, Haynes WJ, Loukin SH, Kung C, Saimi Y. Prokaryotic K(+) channels: from crystal structures to diversity. *FEMS microbiology reviews*. 2005; 29(5):961–85. Epub 2005/07/20. doi: [10.1016/j.femsre.2005.03.003](https://doi.org/10.1016/j.femsre.2005.03.003) PMID: [16026885](https://pubmed.ncbi.nlm.nih.gov/16026885/).
10. Loukin SH, Kuo MM, Zhou XL, Haynes WJ, Kung C, Saimi Y. Microbial K+ channels. *J Gen Physiol*. 2005; 125(6):521–7. Epub 2005/05/18. doi: [10.1085/jgp.200509261](https://doi.org/10.1085/jgp.200509261) PMID: [15897296](https://pubmed.ncbi.nlm.nih.gov/15897296/); PubMed Central PMCID: [PMC2234077](https://pubmed.ncbi.nlm.nih.gov/pmc/articles/PMC2234077/).
11. Li X, Liu H, Chu Luo J, Rhodes SA, Trigg LM, van Rossum DB, et al. Major diversification of voltage-gated K+ channels occurred in ancestral parahoxozoans. *Proc Natl Acad Sci U S A*. 2015; 112(9):E1010–9. Epub 2015/02/19. doi: [10.1073/pnas.1422941112](https://doi.org/10.1073/pnas.1422941112) PMID: [25691740](https://pubmed.ncbi.nlm.nih.gov/25691740/); PubMed Central PMCID: [PMC4352839](https://pubmed.ncbi.nlm.nih.gov/pmc/articles/PMC4352839/).
12. Li X, Martinson AS, Layden MJ, Diatta FH, Sberna AP, Simmons DK, et al. Ether-a-go-go family voltage-gated K+ channels evolved in an ancestral metazoan and functionally diversified in a cnidarian-bilaterian ancestor. *J Exp Biol*. 2015; 218(Pt 4):526–36. Epub 2015/02/20. doi: [10.1242/jeb.110080](https://doi.org/10.1242/jeb.110080) PMID: [25696816](https://pubmed.ncbi.nlm.nih.gov/25696816/); PubMed Central PMCID: [PMC4334144](https://pubmed.ncbi.nlm.nih.gov/pmc/articles/PMC4334144/).
13. Ryan JF, Pang K, Program NCS, Mullikin JC, Martindale MQ, Baxeavanis AD. The homeodomain complement of the ctenophore *Mnemiopsis leidyi* suggests that Ctenophora and Porifera diverged prior to the Parahoxozoa. *EvoDevo*. 2010; 1(1):9. doi: [10.1186/2041-9139-1-9](https://doi.org/10.1186/2041-9139-1-9) PMID: [20920347](https://pubmed.ncbi.nlm.nih.gov/20920347/); PubMed Central PMCID: [PMC2959044](https://pubmed.ncbi.nlm.nih.gov/pmc/articles/PMC2959044/).
14. Jegla T, Grigoriev N, Gallin WJ, Salkoff L, Spencer AN. Multiple Shaker potassium channels in a primitive metazoan. *J Neurosci*. 1995; 15(12):7989–99. Epub 1995/12/01. PMID: [8613736](https://pubmed.ncbi.nlm.nih.gov/8613736/).
15. Jegla T, Salkoff L. A novel subunit for shal K+ channels radically alters activation and inactivation. *The Journal of neuroscience: the official journal of the Society for Neuroscience*. 1997; 17(1):32–44. Epub 1997/01/01. PMID: [8987734](https://pubmed.ncbi.nlm.nih.gov/8987734/).
16. Jegla T, Marlow HQ, Chen B, Simmons DK, Jacobo SM, Martindale MQ. Expanded functional diversity of shaker K(+) channels in cnidarians is driven by gene expansion. *PLoS One*. 2012; 7(12):e51366. Epub 2012/12/20. doi: [10.1371/journal.pone.0051366](https://doi.org/10.1371/journal.pone.0051366) PONE-D-12-29489 [pii]. PMID: [23251506](https://pubmed.ncbi.nlm.nih.gov/23251506/); PubMed Central PMCID: [PMC3519636](https://pubmed.ncbi.nlm.nih.gov/pmc/articles/PMC3519636/).
17. Martinson AS, van Rossum DB, Diatta FH, Layden MJ, Rhodes SA, Martindale MQ, et al. Functional evolution of Erg potassium channel gating reveals an ancient origin for IKr. *Proc Natl Acad Sci U S A*. 2014; 111(15):5712–7. doi: [10.1073/pnas.1321716111](https://doi.org/10.1073/pnas.1321716111) PMID: [24706772](https://pubmed.ncbi.nlm.nih.gov/24706772/); PubMed Central PMCID: [PMC3992637](https://pubmed.ncbi.nlm.nih.gov/pmc/articles/PMC3992637/).
18. Sand RM, Atherton DM, Spencer AN, Gallin WJ. jShaw1, a low-threshold, fast-activating K(v)3 from the hydrozoan jellyfish *Polyorchis penicillatus*. *J Exp Biol*. 2011; 214(Pt 18):3124–37. Epub 2011/08/26. doi: [10.1242/jeb.057000](https://doi.org/10.1242/jeb.057000) PMID: [21865525](https://pubmed.ncbi.nlm.nih.gov/21865525/).
19. Moran Y, Zakon HH. The evolution of the four subunits of voltage-gated calcium channels: ancient roots, increasing complexity, and multiple losses. *Genome biology and evolution*. 2014; 6(9):2210–7. Epub 2014/08/26. doi: [10.1093/gbe/evu177](https://doi.org/10.1093/gbe/evu177) PMID: [25146647](https://pubmed.ncbi.nlm.nih.gov/25146647/); PubMed Central PMCID: [PMC4202318](https://pubmed.ncbi.nlm.nih.gov/pmc/articles/PMC4202318/).
20. Gur Barzilai M, Reitzel AM, Kraus JE, Gordon D, Technau U, Gurevitz M, et al. Convergent evolution of sodium ion selectivity in metazoan neuronal signaling. *Cell reports*. 2012; 2(2):242–8. Epub 2012/08/03. doi: [10.1016/j.celrep.2012.06.016](https://doi.org/10.1016/j.celrep.2012.06.016) PMID: [22854023](https://pubmed.ncbi.nlm.nih.gov/22854023/); PubMed Central PMCID: [PMC3809514](https://pubmed.ncbi.nlm.nih.gov/pmc/articles/PMC3809514/).
21. Zagotta WN, Olivier NB, Black KD, Young EC, Olson R, Gouaux E. Structural basis for modulation and agonist specificity of HCN pacemaker channels. *Nature*. 2003; 425(6954):200–5. Epub 2003/09/12. doi: [10.1038/nature01922](https://doi.org/10.1038/nature01922) PMID: [12968185](https://pubmed.ncbi.nlm.nih.gov/12968185/).
22. Jegla T, Salkoff L. Molecular evolution of K+ channels in primitive eukaryotes. *Soc Gen Physiol Ser*. 1994; 49:213–22. Epub 1994/01/01. PMID: [7939896](https://pubmed.ncbi.nlm.nih.gov/7939896/).
23. Jegla T, Salkoff L. A multigene family of novel K+ channels from *Paramecium tetraurelia*. *Receptors Channels*. 1995; 3(1):51–60. Epub 1995/01/01. PMID: [8589993](https://pubmed.ncbi.nlm.nih.gov/8589993/).
24. Schachtman DP, Schroeder JI, Lucas WJ, Anderson JA, Gaber RF. Expression of an inward-rectifying potassium channel by the *Arabidopsis* KAT1 cDNA. *Science*. 1992; 258(5088):1654–8. PMID: [8966547](https://pubmed.ncbi.nlm.nih.gov/8966547/).
25. Sentenac H, Bonneaud N, Minet M, Lacroute F, Salmon JM, Gaymard F, et al. Cloning and expression in yeast of a plant potassium ion transport system. *Science*. 1992; 256(5057):663–5. PMID: [1585180](https://pubmed.ncbi.nlm.nih.gov/1585180/).
26. Craven KB, Zagotta WN. CNG and HCN channels: two peas, one pod. *Annu Rev Physiol*. 2006; 68:375–401. Epub 2006/02/08. doi: [10.1146/annurev.physiol.68.040104.134728](https://doi.org/10.1146/annurev.physiol.68.040104.134728) PMID: [16460277](https://pubmed.ncbi.nlm.nih.gov/16460277/).
27. Flynn GE, Zagotta WN. Molecular mechanism underlying phosphatidylinositol 4,5-bisphosphate-induced inhibition of SpIH channels. *J Biol Chem*. 2011; 286(17):15535–42. Epub 2011/03/09. doi: [10.1074/jbc.M110.214650](https://doi.org/10.1074/jbc.M110.214650) PMID: [21383006](https://pubmed.ncbi.nlm.nih.gov/21383006/); PubMed Central PMCID: [PMC3083228](https://pubmed.ncbi.nlm.nih.gov/pmc/articles/PMC3083228/).

28. Wainger BJ, DeGennaro M, Santoro B, Siegelbaum SA, Tibbs GR. Molecular mechanism of cAMP modulation of HCN pacemaker channels. *Nature*. 2001; 411(6839):805–10. Epub 2001/07/19. doi: [10.1038/35081088](https://doi.org/10.1038/35081088) PMID: [11459060](https://pubmed.ncbi.nlm.nih.gov/11459060/).
29. Chen S, Wang J, Zhou L, George MS, Siegelbaum SA. Voltage sensor movement and cAMP binding allosterically regulate an inherently voltage-independent closed-open transition in HCN channels. *J Gen Physiol*. 2007; 129(2):175–88. Epub 2007/01/31. doi: [10.1085/jgp.200609585](https://doi.org/10.1085/jgp.200609585) PMID: [17261842](https://pubmed.ncbi.nlm.nih.gov/17261842/); PubMed Central PMCID: PMCPMC2154356.
30. Brelidze TI, Carlson AE, Zagotta WN. Absence of direct cyclic nucleotide modulation of mEAG1 and hERG1 channels revealed with fluorescence and electrophysiological methods. *J Biol Chem*. 2009; 284(41):27989–97. doi: [10.1074/jbc.M109.016337](https://doi.org/10.1074/jbc.M109.016337) PMID: [19671703](https://pubmed.ncbi.nlm.nih.gov/19671703/); PubMed Central PMCID: PMC2788851.
31. Brelidze TI, Carlson AE, Sankaran B, Zagotta WN. Structure of the carboxy-terminal region of a KCNH channel. *Nature*. 2012; 481(7382):530–3. doi: [10.1038/nature10735](https://doi.org/10.1038/nature10735) PMID: [22230959](https://pubmed.ncbi.nlm.nih.gov/22230959/); PubMed Central PMCID: PMC3267858.
32. Brelidze TI, Gianulis EC, DiMaio F, Trudeau MC, Zagotta WN. Structure of the C-terminal region of an ERG channel and functional implications. *Proc Natl Acad Sci U S A*. 2013; 110(28):11648–53. Epub 2013/06/27. doi: [10.1073/pnas.1306887110](https://doi.org/10.1073/pnas.1306887110) PMID: [23801759](https://pubmed.ncbi.nlm.nih.gov/23801759/); PubMed Central PMCID: PMCPMC3710865.
33. Haitin Y, Carlson AE, Zagotta WN. The structural mechanism of KCNH-channel regulation by the eag domain. *Nature*. 2013; 501(7467):444–8. Epub 2013/08/27. doi: [10.1038/nature12487](https://doi.org/10.1038/nature12487) PMID: [23975098](https://pubmed.ncbi.nlm.nih.gov/23975098/); PubMed Central PMCID: PMCPMC3910112.
34. Mannikko R, Elinder F, Larsson HP. Voltage-sensing mechanism is conserved among ion channels gated by opposite voltages. *Nature*. 2002; 419(6909):837–41. Epub 2002/10/25. doi: [10.1038/nature01038](https://doi.org/10.1038/nature01038) PMID: [12397358](https://pubmed.ncbi.nlm.nih.gov/12397358/).
35. Zhainazarov AB, Spehr M, Wetzel CH, Hatt H, Ache BW. Modulation of the olfactory CNG channel by PtdIns(3,4,5)P<sub>3</sub>. *J Membr Biol*. 2004; 201(1):51–7. Epub 2005/01/08. PMID: [15635812](https://pubmed.ncbi.nlm.nih.gov/15635812/).
36. Bright SR, Rich ED, Varnum MD. Regulation of human cone cyclic nucleotide-gated channels by endogenous phospholipids and exogenously applied phosphatidylinositol 3,4,5-trisphosphate. *Mol Pharmacol*. 2007; 71(1):176–83. Epub 2006/10/05. doi: [10.1124/mol.106.026401](https://doi.org/10.1124/mol.106.026401) PMID: [17018579](https://pubmed.ncbi.nlm.nih.gov/17018579/).
37. Pian P, Bucchi A, Robinson RB, Siegelbaum SA. Regulation of gating and rundown of HCN hyperpolarization-activated channels by exogenous and endogenous PIP<sub>2</sub>. *J Gen Physiol*. 2006; 128(5):593–604. Epub 2006/11/01. doi: [10.1085/jgp.200609648](https://doi.org/10.1085/jgp.200609648) PMID: [17074978](https://pubmed.ncbi.nlm.nih.gov/17074978/); PubMed Central PMCID: PMCPMC2151583.
38. Baruscotti M, Bucchi A, DiFrancesco D. Physiology and pharmacology of the cardiac pacemaker ("funny") current. *Pharmacol Ther*. 2005; 107(1):59–79. Epub 2005/06/21. doi: [10.1016/j.pharmthera.2005.01.005](https://doi.org/10.1016/j.pharmthera.2005.01.005) PMID: [15963351](https://pubmed.ncbi.nlm.nih.gov/15963351/).
39. Er F, Larbig R, Ludwig A, Biel M, Hofmann F, Beuckelmann DJ, et al. Dominant-negative suppression of HCN channels markedly reduces the native pacemaker current I<sub>f</sub> and undermines spontaneous beating of neonatal cardiomyocytes. *Circulation*. 2003; 107(3):485–9. Epub 2003/01/29. PMID: [12551875](https://pubmed.ncbi.nlm.nih.gov/12551875/).
40. Robinson RB, Siegelbaum SA. Hyperpolarization-activated cation currents: from molecules to physiological function. *Annu Rev Physiol*. 2003; 65:453–80. Epub 2002/12/10. doi: [10.1146/annurev.physiol.65.092101.142734](https://doi.org/10.1146/annurev.physiol.65.092101.142734) PMID: [12471170](https://pubmed.ncbi.nlm.nih.gov/12471170/).
41. Zolles G, Klocker N, Wenzel D, Weisser-Thomas J, Fleischmann BK, Roeper J, et al. Pacemaking by HCN channels requires interaction with phosphoinositides. *Neuron*. 2006; 52(6):1027–36. Epub 2006/12/21. doi: [10.1016/j.neuron.2006.12.005](https://doi.org/10.1016/j.neuron.2006.12.005) PMID: [17178405](https://pubmed.ncbi.nlm.nih.gov/17178405/).
42. DiFrancesco D. Pacemaker mechanisms in cardiac tissue. *Annu Rev Physiol*. 1993; 55:455–72. Epub 1993/01/01. doi: [10.1146/annurev.ph.55.030193.002323](https://doi.org/10.1146/annurev.ph.55.030193.002323) PMID: [7682045](https://pubmed.ncbi.nlm.nih.gov/7682045/).
43. Nolan MF, Malleret G, Dudman JT, Buhl DL, Santoro B, Gibbs E, et al. A behavioral role for dendritic integration: HCN1 channels constrain spatial memory and plasticity at inputs to distal dendrites of CA1 pyramidal neurons. *Cell*. 2004; 119(5):719–32. Epub 2004/11/20. doi: [10.1016/j.cell.2004.11.020](https://doi.org/10.1016/j.cell.2004.11.020) PMID: [15550252](https://pubmed.ncbi.nlm.nih.gov/15550252/).
44. Tsay D, Dudman JT, Siegelbaum SA. HCN1 channels constrain synaptically evoked Ca<sup>2+</sup> spikes in distal dendrites of CA1 pyramidal neurons. *Neuron*. 2007; 56(6):1076–89. Epub 2007/12/21. doi: [10.1016/j.neuron.2007.11.015](https://doi.org/10.1016/j.neuron.2007.11.015) PMID: [18093528](https://pubmed.ncbi.nlm.nih.gov/18093528/); PubMed Central PMCID: PMCPMC2435011.
45. George MS, Abbott LF, Siegelbaum SA. HCN hyperpolarization-activated cation channels inhibit EPSPs by interactions with M-type K(+) channels. *Nat Neurosci*. 2009; 12(5):577–84. Epub 2009/04/14. doi: [10.1038/nn.2307](https://doi.org/10.1038/nn.2307) PMID: [19363490](https://pubmed.ncbi.nlm.nih.gov/19363490/); PubMed Central PMCID: PMCPMC2674138.



46. Santoro B, Liu DT, Yao H, Bartsch D, Kandel ER, Siegelbaum SA, et al. Identification of a gene encoding a hyperpolarization-activated pacemaker channel of brain. *Cell*. 1998; 93(5):717–29. Epub 1998/06/18. PMID: [9630217](#).
47. Ludwig A, Zong X, Jeglitsch M, Hofmann F, Biel M. A family of hyperpolarization-activated mammalian cation channels. *Nature*. 1998; 393(6685):587–91. Epub 1998/06/20. doi: [10.1038/31255](#) PMID: [9634236](#).
48. Ishii TM, Takano M, Xie LH, Noma A, Ohmori H. Molecular characterization of the hyperpolarization-activated cation channel in rabbit heart sinoatrial node. *J Biol Chem*. 1999; 274(18):12835–9. Epub 1999/04/23. PMID: [10212270](#).
49. Jackson HA, Hogle A, Nazzari H, Jegla T, Accili EA. Asymmetric divergence in structure and function of HCN channel duplicates in *Ciona intestinalis*. *PLoS One*. 2012; 7(11):e47590. Epub 2012/11/08. doi: [10.1371/journal.pone.0047590](#) PMID: [23133599](#); PubMed Central PMCID: PMC3487815.
50. Gauss R, Seifert R, Kaupp UB. Molecular identification of a hyperpolarization-activated channel in sea urchin sperm. *Nature*. 1998; 393(6685):583–7. Epub 1998/06/20. doi: [10.1038/31248](#) PMID: [9634235](#).
51. Gisselmann G, Warnstedt M, Gamerschlag B, Bormann A, Marx T, Neuhaus EM, et al. Characterization of recombinant and native Ih-channels from *Apis mellifera*. *Insect biochemistry and molecular biology*. 2003; 33(11):1123–34. Epub 2003/10/18. PMID: [14563363](#).
52. Ouyang Q, Goeritz M, Harris-Warrick RM. *Panulirus interruptus* Ih-channel gene PIH: modification of channel properties by alternative splicing and role in rhythmic activity. *Journal of neurophysiology*. 2007; 97(6):3880–92. Epub 2007/04/06. doi: [10.1152/jn.00246.2007](#) PMID: [17409170](#).
53. Cai X. Evolutionary genomics reveals the premetazoan origin of opposite gating polarity in animal-type voltage-gated ion channels. *Genomics*. 2012; 99(4):241–5. Epub 2012/02/14. doi: [10.1016/j.ygeno.2012.01.007](#) PMID: [22326743](#).
54. Altschul SF, Madden TL, Schaffer AA, Zhang J, Zhang Z, Miller W, et al. Gapped BLAST and PSI-BLAST: a new generation of protein database search programs. *Nucleic Acids Res*. 1997; 25(17):3389–402. Epub 1997/09/01. gka562 [pii]. PMID: [9254694](#); PubMed Central PMCID: PMC146917.
55. Putnam NH, Srivastava M, Hellsten U, Dirks B, Chapman J, Salamov A, et al. Sea anemone genome reveals ancestral eumetazoan gene repertoire and genomic organization. *Science*. 2007; 317(5834):86–94. Epub 2007/07/07. 317/5834/86 [pii] doi: [10.1126/science.1139158](#) PMID: [17615350](#).
56. Moya A, Huisman L, Ball EE, Hayward DC, Grasso LC, Chua CM, et al. Whole transcriptome analysis of the coral *Acropora millepora* reveals complex responses to CO<sub>2</sub>-driven acidification during the initiation of calcification. *Molecular ecology*. 2012; 21(10):2440–54. Epub 2012/04/12. doi: [10.1111/j.1365-294X.2012.05554.x](#) PMID: [22490231](#).
57. Moroz LL, Kocot KM, Citarella MR, Dosung S, Norekian TP, Povolotskaya IS, et al. The ctenophore genome and the evolutionary origins of neural systems. *Nature*. 2014; 510(7503):109–14. doi: [10.1038/nature13400](#) PMID: [24847885](#).
58. Riesgo A, Farrar N, Windsor PJ, Giribet G, Leys SP. The Analysis of Eight Transcriptomes from All Poriferan Classes Reveals Surprising Genetic Complexity in Sponges. *Molecular biology and evolution*. 2014; 31(5):1102–20. doi: [10.1093/molbev/msu057](#) PMID: [WOS:000335914400005](#).
59. Li Y, Zaydman MA, Wu D, Shi J, Guan M, Virgin-Downey B, et al. KCNE1 enhances phosphatidylinositol 4,5-bisphosphate (PIP<sub>2</sub>) sensitivity of IKs to modulate channel activity. *Proc Natl Acad Sci U S A*. 2011; 108(22):9095–100. Epub 2011/05/18. doi: [10.1073/pnas.1100872108](#) PMID: [21576493](#); PubMed Central PMCID: PMC3107281.
60. Tamura K, Stecher G, Peterson D, Filipinski A, Kumar S. MEGA6: Molecular Evolutionary Genetics Analysis version 6.0. *Molecular biology and evolution*. 2013; 30(12):2725–9. Epub 2013/10/18. doi: [10.1093/molbev/mst197](#) PMID: [24132122](#); PubMed Central PMCID: PMC3840312.
61. Ronquist F, Teslenko M, van der Mark P, Ayres DL, Darling A, Höhna S, et al. MrBayes 3.2: efficient Bayesian phylogenetic inference and model choice across a large model space. *Syst Biol*. 2012; 61(3):539–42. Epub 2012/02/24. doi: [10.1093/sysbio/sys029](#) sys029 [pii]. PMID: [22357727](#); PubMed Central PMCID: PMC3329765.
62. Clancy SM, Chen B, Bertaso F, Mamet J, Jegla T. KCNE1 and KCNE3 beta-subunits regulate membrane surface expression of Kv12.2 K(+) channels in vitro and form a tripartite complex in vivo. *PLoS One*. 2009; 4(7):e6330. Epub 2009/07/23. doi: [10.1371/journal.pone.0006330](#) PMID: [19623261](#); PubMed Central PMCID: PMC2710002.
63. Papadopoulos JS, Agarwala R. COBALT: constraint-based alignment tool for multiple protein sequences. *Bioinformatics*. 2007; 23(9):1073–9. Epub 2007/03/03. doi: [10.1093/bioinformatics/btm076](#) PMID: [17332019](#).

64. Whelan NV, Kocot KM, Moroz LL, Halanych KM. Error, signal, and the placement of Ctenophora sister to all other animals. *Proc Natl Acad Sci U S A*. 2015; 112(18):5773–8. Epub 2015/04/23. doi: [10.1073/pnas.1503453112](https://doi.org/10.1073/pnas.1503453112) PMID: [25902535](https://pubmed.ncbi.nlm.nih.gov/25902535/); PubMed Central PMCID: [PMCPmc4426464](https://pubmed.ncbi.nlm.nih.gov/PMC4426464/).
65. Ryan JF, Pang K, Schnitzler CE, Nguyen AD, Moreland RT, Simmons DK, et al. The genome of the ctenophore *Mnemiopsis leidyi* and its implications for cell type evolution. *Science*. 2013; 342(6164):1242592. doi: [10.1126/science.1242592](https://doi.org/10.1126/science.1242592) PMID: [24337300](https://pubmed.ncbi.nlm.nih.gov/24337300/); PubMed Central PMCID: [PMC3920664](https://pubmed.ncbi.nlm.nih.gov/PMC3920664/).
66. Salichos L, Rokas A. Inferring ancient divergences requires genes with strong phylogenetic signals. *Nature*. 2013; 497(7449):327–31. Epub 2013/05/10. doi: [10.1038/nature12130](https://doi.org/10.1038/nature12130) PMID: [23657258](https://pubmed.ncbi.nlm.nih.gov/23657258/).
67. Degnan JH, Rosenberg NA. Gene tree discordance, phylogenetic inference and the multispecies coalescent. *Trends in ecology & evolution*. 2009; 24(6):332–40. Epub 2009/03/25. doi: [10.1016/j.tree.2009.01.009](https://doi.org/10.1016/j.tree.2009.01.009) PMID: [19307040](https://pubmed.ncbi.nlm.nih.gov/19307040/).
68. Chapman JA, Kirkness EF, Simakov O, Hampson SE, Mitros T, Weinmaier T, et al. The dynamic genome of Hydra. *Nature*. 2010; 464(7288):592–6. Epub 2010/03/17. [nature08830](https://doi.org/10.1038/nature08830) [pii] doi: [10.1038/nature08830](https://doi.org/10.1038/nature08830) PMID: [20228792](https://pubmed.ncbi.nlm.nih.gov/20228792/).
69. Shinzato C, Shoguchi E, Kawashima T, Hamada M, Hisata K, Tanaka M, et al. Using the *Acropora digitifera* genome to understand coral responses to environmental change. *Nature*. 2011; 476(7360):320–3. Epub 2011/07/26. doi: [10.1038/nature10249](https://doi.org/10.1038/nature10249) PMID: [21785439](https://pubmed.ncbi.nlm.nih.gov/21785439/).
70. Srivastava M, Simakov O, Chapman J, Fahey B, Gauthier ME, Mitros T, et al. The Amphimedon queen-slandica genome and the evolution of animal complexity. *Nature*. 2010; 466(7307):720–6. Epub 2010/08/06. [nature09201](https://doi.org/10.1038/nature09201) [pii] doi: [10.1038/nature09201](https://doi.org/10.1038/nature09201) PMID: [20686567](https://pubmed.ncbi.nlm.nih.gov/20686567/); PubMed Central PMCID: [PMC3130542](https://pubmed.ncbi.nlm.nih.gov/PMC3130542/).
71. King N, Westbrook MJ, Young SL, Kuo A, Abedin M, Chapman J, et al. The genome of the choanoflagellate *Monosiga brevicollis* and the origin of metazoans. *Nature*. 2008; 451(7180):783–8. Epub 2008/02/15. [nature06617](https://doi.org/10.1038/nature06617) [pii] doi: [10.1038/nature06617](https://doi.org/10.1038/nature06617) PMID: [18273011](https://pubmed.ncbi.nlm.nih.gov/18273011/); PubMed Central PMCID: [PMC2562698](https://pubmed.ncbi.nlm.nih.gov/PMC2562698/).
72. Srivastava M, Begovic E, Chapman J, Putnam NH, Hellsten U, Kawashima T, et al. The *Trichoplax* genome and the nature of placozoans. *Nature*. 2008; 454(7207):955–60. Epub 2008/08/23. [nature07191](https://doi.org/10.1038/nature07191) [pii] doi: [10.1038/nature07191](https://doi.org/10.1038/nature07191) PMID: [18719581](https://pubmed.ncbi.nlm.nih.gov/18719581/).
73. Seifert R, Scholten A, Gauss R, Mincheva A, Lichter P, Kaupp UB. Molecular characterization of a slowly gating human hyperpolarization-activated channel predominantly expressed in thalamus, heart, and testis. *Proc Natl Acad Sci U S A*. 1999; 96(16):9391–6. Epub 1999/08/04. PMID: [10430953](https://pubmed.ncbi.nlm.nih.gov/10430953/); PubMed Central PMCID: [PMCPMC17793](https://pubmed.ncbi.nlm.nih.gov/PMC17793/).
74. Mistrik P, Mader R, Michalakis S, Weidinger M, Pfeifer A, Biel M. The murine HCN3 gene encodes a hyperpolarization-activated cation channel with slow kinetics and unique response to cyclic nucleotides. *J Biol Chem*. 2005; 280(29):27056–61. Epub 2005/06/01. doi: [10.1074/jbc.M502696200](https://doi.org/10.1074/jbc.M502696200) PMID: [15923185](https://pubmed.ncbi.nlm.nih.gov/15923185/).
75. Stieber J, Stockl G, Herrmann S, Hassfurth B, Hofmann F. Functional expression of the human HCN3 channel. *J Biol Chem*. 2005; 280(41):34635–43. Epub 2005/07/27. doi: [10.1074/jbc.M502508200](https://doi.org/10.1074/jbc.M502508200) PMID: [16043489](https://pubmed.ncbi.nlm.nih.gov/16043489/).
76. Murata Y, Iwasaki H, Sasaki M, Inaba K, Okamura Y. Phosphoinositide phosphatase activity coupled to an intrinsic voltage sensor. *Nature*. 2005; 435(7046):1239–43. Epub 2005/05/20. doi: [10.1038/nature03650](https://doi.org/10.1038/nature03650) PMID: [15902207](https://pubmed.ncbi.nlm.nih.gov/15902207/).
77. Halaszovich CR, Schreiber DN, Oliver D. Ci-VSP is a depolarization-activated phosphatidylinositol-4,5-bisphosphate and phosphatidylinositol-3,4,5-trisphosphate 5'-phosphatase. *J Biol Chem*. 2009; 284(4):2106–13. Epub 2008/12/03. doi: [10.1074/jbc.M803543200](https://doi.org/10.1074/jbc.M803543200) PMID: [19047057](https://pubmed.ncbi.nlm.nih.gov/19047057/).
78. Layden MJ, Boekhout M, Martindale MQ. *Nematostella vectensis* achaete-scute homolog NvashA regulates embryonic ectodermal neurogenesis and represents an ancient component of the metazoan neural specification pathway. *Development (Cambridge, England)*. 2012; 139(5):1013–22. Epub 2012/02/10. doi: [10.1242/dev.073221](https://doi.org/10.1242/dev.073221) PMID: [22318631](https://pubmed.ncbi.nlm.nih.gov/22318631/); PubMed Central PMCID: [PMCPmc3274362](https://pubmed.ncbi.nlm.nih.gov/PMC3274362/).
79. Layden MJ, Martindale MQ. Non-canonical Notch signaling represents an ancestral mechanism to regulate neural differentiation. *EvoDevo*. 2014; 5:30. Epub 2015/02/24. doi: [10.1186/2041-9139-5-30](https://doi.org/10.1186/2041-9139-5-30) PMID: [25705370](https://pubmed.ncbi.nlm.nih.gov/25705370/); PubMed Central PMCID: [PMCPmc3435385](https://pubmed.ncbi.nlm.nih.gov/PMC3435385/).
80. Marlow H, Roettinger E, Boekhout M, Martindale MQ. Functional roles of Notch signaling in the cnidarian *Nematostella vectensis*. *Dev Biol*. 2011; 300(1):1606–11. Epub 2011/12/14. S0012-1606(11)01394-7 [pii] doi: [10.1016/j.ydbio.2011.11.012](https://doi.org/10.1016/j.ydbio.2011.11.012) PMID: [22155407](https://pubmed.ncbi.nlm.nih.gov/22155407/).
81. Moran Y, Barzilai MG, Liebeskind BJ, Zakon HH. Evolution of voltage-gated ion channels at the emergence of Metazoa. *J Exp Biol*. 2015; 218(Pt 4):515–25. Epub 2015/02/20. doi: [10.1242/jeb.110270](https://doi.org/10.1242/jeb.110270) PMID: [25696815](https://pubmed.ncbi.nlm.nih.gov/25696815/).

82. Ying SW, Jia F, Abbas SY, Hofmann F, Ludwig A, Goldstein PA. Dendritic HCN2 channels constrain glutamate-driven excitability in reticular thalamic neurons. *J Neurosci*. 2007; 27(32):8719–32. Epub 2007/08/10. doi: [10.1523/jneurosci.1630-07.2007](https://doi.org/10.1523/jneurosci.1630-07.2007) PMID: [17687049](https://pubmed.ncbi.nlm.nih.gov/17687049/).
83. Horwitz GC, Risner-Janiczek JR, Jones SM, Holt JR. HCN channels expressed in the inner ear are necessary for normal balance function. *J Neurosci*. 2011; 31(46):16814–25. Epub 2011/11/18. doi: [10.1523/jneurosci.3064-11.2011](https://doi.org/10.1523/jneurosci.3064-11.2011) PMID: [22090507](https://pubmed.ncbi.nlm.nih.gov/22090507/); PubMed Central PMCID: [PMCPmc3477615](https://pubmed.ncbi.nlm.nih.gov/PMC3477615/).
84. Budde T, Caputi L, Kanyshkova T, Staak R, Abrahamczik C, Munsch T, et al. Impaired regulation of thalamic pacemaker channels through an imbalance of subunit expression in absence epilepsy. *J Neurosci*. 2005; 25(43):9871–82. Epub 2005/10/28. doi: [10.1523/jneurosci.2590-05.2005](https://doi.org/10.1523/jneurosci.2590-05.2005) PMID: [16251434](https://pubmed.ncbi.nlm.nih.gov/16251434/).
85. Rodriguez-Menchaca AA, Adney SK, Tang QY, Meng XY, Rosenhouse-Dantsker A, Cui M, et al. PIP2 controls voltage-sensor movement and pore opening of Kv channels through the S4-S5 linker. *Proc Natl Acad Sci U S A*. 2012; 109(36):E2399–408. Epub 2012/08/15. doi: [10.1073/pnas.1207901109](https://doi.org/10.1073/pnas.1207901109) PMID: [22891352](https://pubmed.ncbi.nlm.nih.gov/22891352/); PubMed Central PMCID: [PMCPMC3437867](https://pubmed.ncbi.nlm.nih.gov/PMC3437867/).
86. Zaydman MA, Silva JR, Delaloye K, Li Y, Liang H, Larsson HP, et al. Kv7.1 ion channels require a lipid to couple voltage sensing to pore opening. *Proc Natl Acad Sci U S A*. 2013; 110(32):13180–5. Epub 2013/07/19. doi: [10.1073/pnas.1305167110](https://doi.org/10.1073/pnas.1305167110) PMID: [23861489](https://pubmed.ncbi.nlm.nih.gov/23861489/); PubMed Central PMCID: [PMCPmc3740903](https://pubmed.ncbi.nlm.nih.gov/PMC3740903/).
87. Rodriguez-Menchaca AA, Adney SK, Zhou L, Logothetis DE. Dual Regulation of Voltage-Sensitive Ion Channels by PIP(2). *Front Pharmacol*. 2012; 3:170. Epub 2012/10/12. doi: [10.3389/fphar.2012.00170](https://doi.org/10.3389/fphar.2012.00170) PMID: [23055973](https://pubmed.ncbi.nlm.nih.gov/23055973/); PubMed Central PMCID: [PMCPMC3456799](https://pubmed.ncbi.nlm.nih.gov/PMC3456799/).
88. Hedrich R. Ion channels in plants. *Physiological reviews*. 2012; 92(4):1777–811. Epub 2012/10/18. doi: [10.1152/physrev.00038.2011](https://doi.org/10.1152/physrev.00038.2011) PMID: [23073631](https://pubmed.ncbi.nlm.nih.gov/23073631/).
89. Marlow HQ, Srivastava M, Matus DQ, Rokhsar D, Martindale MQ. Anatomy and development of the nervous system of *Nematostella vectensis*, an anthozoan cnidarian. *Dev Neurobiol*. 2009; 69(4):235–54. Epub 2009/01/27. doi: [10.1002/dneu.20698](https://doi.org/10.1002/dneu.20698) PMID: [19170043](https://pubmed.ncbi.nlm.nih.gov/19170043/).
90. Renfer E, Amon-Hassenzahl A, Steinmetz PR, Technau U. A muscle-specific transgenic reporter line of the sea anemone, *Nematostella vectensis*. *Proc Natl Acad Sci U S A*. 2010; 107(1):104–8. Epub 2009/12/19. doi: [10.1073/pnas.0909148107](https://doi.org/10.1073/pnas.0909148107) PMID: [20018670](https://pubmed.ncbi.nlm.nih.gov/20018670/); PubMed Central PMCID: [PMCPmc2806778](https://pubmed.ncbi.nlm.nih.gov/PMC32806778/).
